# Supplementary material for: Synthesis and Electrochemical Performance of Electrostatic Self-Assembled Nano-Silicon@N-Doped Reduced Graphene Oxide/Carbon Nanofibers Composite as Anode Material for Lithium-Ion Batteries
Source: Preprints.org preprint supplement (doi:10.20944/preprints202106.0411.v1), 2021-06-15
Supplement: Supplementary file 1 [file supplementary]

**Supplementary Information**

Synthesis and Electrochemical Performance of Electrostatic Self-assembly Nano-Silicon@N-doped reduced graphene oxide/Carbon nanofibers Composite as Anode Material for Lithium-Ion Batteries

Ruye Conga, Hyun-Ho Parka, Minsang Job, Hochun Leeb,

Chang-Seop Leea,*

aDepartment of Chemistry, Keimyung University, Daegu 42601, Korea

bDepartment of Energy Science and Engineering, DGIST, Daegu 42988, Korea

*Corresponding author: Chang-Seop Lee

Department of Chemistry, Keimyung University, Daegu 42601, Korea

Phone No: +82-53-580-5192; Fax No: +82-53-580-5056

E-mail: [surfkm@kmu.ac.kr](mailto:surfkm@kmu.ac.kr)


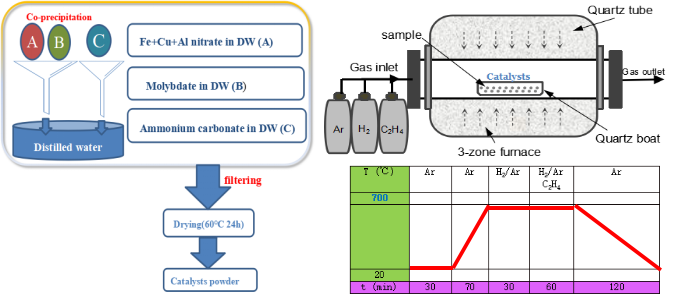


**Figure S1**. Process for preparing the catalysts and the synthesis of carbon nanofibers.


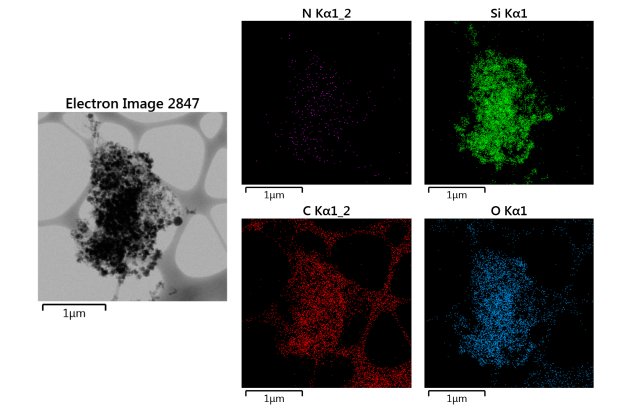


**Figure S2.** The EDS mapping of the Si, N, C, O elements on the surface of the Si@N-doped rGO/CNF composite.

**Table S1.** Raman spectroscopy results of the GO, rGO, CNFs, Si/rGO, and Si/CNF/rGO samples (see Figure 4(b)).

| Sample | ID/IG |
| --- | --- |
| GO | 1.05 |
| rGO | 0.96 |
| CNF | 0.99 |
| Si@APTES/N-doped GO | 1.03 |
| Si/rGO | 1.02 |
| Si@N-doped rGO | 1.00 |
| Si@N-doped rGO/CNF | 1.00 |

**Table S2.** Discharge capacity, coulomb efficiency, and capacity retention rate of the Si/CNF/rGO, Si@N-doped rGO and Si@N-doped rGO/CNF composite electrodes.

| Samples | Max. discharge  capacity  (mAh/g) | Discharge capacity (mAh/g) | | Coulomb efficiency (%) | | Capacity retention rate (%) | |
| --- | --- | --- | --- | --- | --- | --- | --- |
| **After 37 cycle** | **After 89 cycle** | **first cycle** | **37 cycle** | **After 37 cycle** | **After 89 cycle** |
| Si/CNF/rGO | 3434.9 | 1054.2 | 989.5 | 51.7 | 99.9 | 30.7 | 28.9 |
| Si@N-doped rGO | 3138.8 | 1140.2 | 1093.1 | 66.1 | 94.5 | 36.3 | 34.8 |
| Si@N-doped rGO/CNF | 2192.3 | 1418.8 | - | 71.5 | 99.7 | 64.7 | - |
